# Supplementary material for: CO2 ultrathin film growth on a monolayer of CO2 adsorbed on the NaCl(100) surface: sticking coefficient and IR-optical signatures in the ν3 region
Source: Royal Society of Chemistry journal article supplement (doi:10.1039/d4cp02311k), 2024-01-01
Supplement: d4cp02311k1.pdf [file d4cp02311k1.pdf]

## Supporting Information

### CO<sub>2</sub> ultrathin film growth on a monolayer of CO<sub>2</sub> adsorbed on the NaCl(100) surface: Sticking coefficient and IR-optical signatures in the $\nu_3$ region

Jochen Vogt

9. Juli 2024

## S1 Electric fields

The electric field vectors of polarized IR light at the frontside and at the backside of a transparent, non-absorbing substrate of refractive index  $n$  are determined using Fresnel's equations [1]. Consider the geometry shown in Fig. S1 with the two interfaces 01 and 12. The incoming beam strikes the surface at an angle  $\beta$  against the surface normal. The angle of refraction  $\beta_1$  is determined using Snell's law. The electric field vector of a s-polarized beam oscillates parallel to the surface plane, while in p-polarization, the electric field vector oscillates in the sagittal plane. Then, introducing the Fresnel amplitude coefficients for s-polarization and p-polarization,

$$t_{01,s} = \frac{2 \cos \beta}{(\cos \beta + n \cos \beta_1)} \quad t_{01,p} = \frac{2n \cos \beta}{(n \cos \beta + \cos \beta_1)} \quad (1)$$

$$t_{12,s} = \frac{2n \cos \beta_1}{(\cos \beta + n \cos \beta_1)} \quad t_{12,p} = \frac{2 \cos \beta_1}{(n \cos \beta + \cos \beta_1)} \quad (2)$$

$$r_{01,s} = \frac{\cos \beta - n \cos \beta_1}{(\cos \beta + n \cos \beta_1)} \quad r_{01,p} = \frac{n \cos \beta - \cos \beta_1}{(n \cos \beta + \cos \beta_1)}, \quad (3)$$

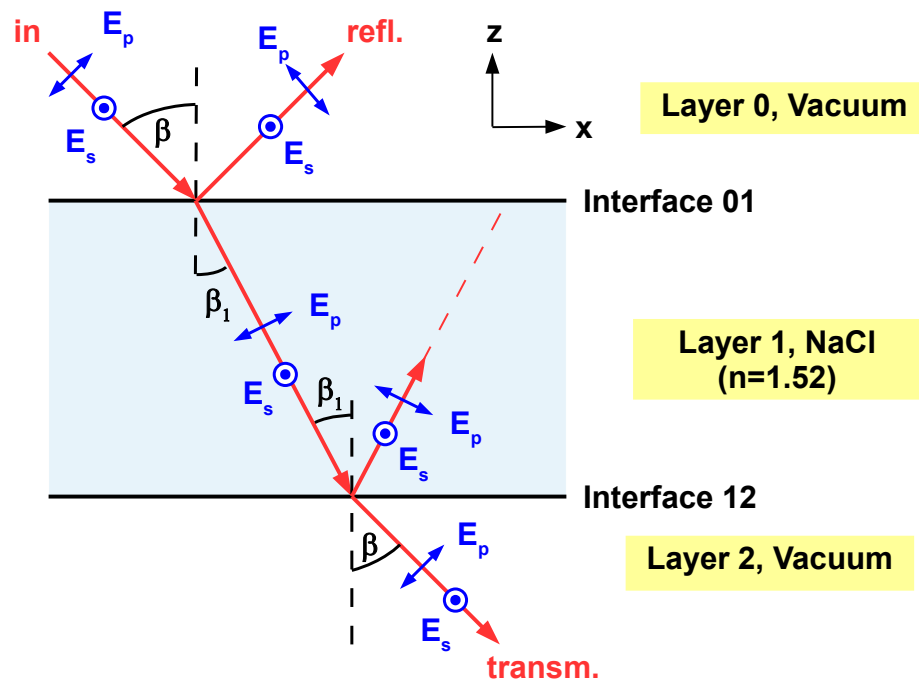

Fig. 1: Partial reflection and transmission of an IR beam at a non-absorbing slab (NaCl). In s-polarization, the electric field vector  $\vec{E}_s$  oscillates parallel to the surface plane (symbol  $\odot$ ), while in p-polarized light  $\vec{E}_p$  oscillates in the sagittal plane spanned by the surface normal and the direction of the incoming beam ("in").

the electric field components in the depicted frame of reference are

$$\vec{\varepsilon}_{\text{front}} = \frac{\vec{E}_{\text{front}}}{E_{\text{in}}} = \begin{pmatrix} (1 - r_{01,p}) \cos \beta \sin \delta \\ t_{01,s} t_{12,s} \cos \delta \\ (1 + r_{01,p}) \sin \beta \sin \delta \end{pmatrix} \quad (4)$$

and

$$\vec{\varepsilon}_{\text{back}} = \frac{\vec{E}_{\text{back}}}{E_{\text{in}}} = \begin{pmatrix} t_{01,p} t_{12,p} \cos \beta \sin \delta \\ (1 + r_{01,s}) \cos \delta \\ t_{01,p} t_{12,p} \sin \beta \sin \delta \end{pmatrix} \quad (5)$$

where the s-polarized field is obtained for  $\delta = 0^\circ$ , and the p-polarized field is obtained for  $\delta = 90^\circ$ . For the purpose of domain averaging, the vectors of eq. 4 and eq. 5 is rotated by  $90^\circ$ ,  $180^\circ$ , and  $270^\circ$  around the surface normal in the substrate fixed frame of reference:

$$\vec{\varepsilon}_{\text{front}}^j = \vec{\varepsilon}_{\text{front}} \begin{pmatrix} \cos\left(\frac{j\pi}{2}\right) \\ \sin\left(\frac{j\pi}{2}\right) \\ 0 \end{pmatrix} \quad j = 0, 1, 2, 3 \quad (6)$$

$$\vec{\varepsilon}_{\text{back}}^j = \vec{\varepsilon}_{\text{back}} \begin{pmatrix} \cos\left(\frac{j\pi}{2}\right) \\ \sin\left(\frac{j\pi}{2}\right) \\ 0 \end{pmatrix} \quad j = 0, 1, 2, 3 \quad (7)$$

## S2 Potential calculations for vibrational exciton model

The SAPT-s pair potential model by Bukowski et al. [2] for CO<sub>2</sub> uses 5 centers O-M-C-M-O to account for the intermolecular interaction between two molecules A and B at distance  $r_{AB}$ . It is defined by

$$V_{MM,AB} = \sum_{a \in A} \sum_{b \in B} \left[ e^{\alpha_{ab} - \beta_{ab} r_{ab}} + f_1(\delta_1^{ab} r_{ab}) \frac{q_a q_b}{r_{ab}} - f_6(\delta_6^{ab}) \frac{C_6^{ab}}{r_{ab}^6} - f_8(\delta_8^{ab}) \frac{C_8^{ab}}{r_{ab}^8} \right] \quad (8)$$

$$f_n(x) = 1 - e^{-x} \sum_{k=0}^n \frac{x^k}{k!}. \quad (9)$$

|     | $\alpha$     | $\beta$ [ $\text{\AA}^{-1}$ ] | $\delta_1$ [ $\text{\AA}^{-1}$ ] | $\delta_6$ [ $\text{\AA}^{-1}$ ] |
|-----|--------------|-------------------------------|----------------------------------|----------------------------------|
| O-O | 1.1210441e+1 | 4.0202795                     | 1.4968485                        | 2.5924278                        |
| O-C | 1.1333682e+1 | 4.5074401                     | 1.8797629                        | 1.8139783                        |
| C-C | 1.1399839e+1 | 5.0932632                     | 2.1958809                        | 1.7584847                        |
| O-M |              |                               | 1.9648279                        |                                  |
| C-M |              |                               | 2.6032461                        |                                  |
| M-M |              |                               | 5.2350982                        |                                  |

  

|     | $\delta_8$ [ $\text{\AA}^{-1}$ ] | $C_6$ [kcal mol $^{-1}$ Å $^6$ ] | $C_8$ [kcal mol $^{-1}$ Å $^8$ ] |
|-----|----------------------------------|----------------------------------|----------------------------------|
| O-O | 1.0769328                        | 1.0426642e+3                     | -1.3516797e+4                    |
| O-C | 0.6747229                        | -1.3834479e+3                    | 2.0217414e+4                     |
| C-C | 3.0176726                        | 3.4808543e+3                     | -2.6899552e+4                    |

  

|       |         |
|-------|---------|
| $q_O$ | 0.2379  |
| $q_C$ | 1.6317  |
| $q_M$ | -1.0537 |

Tab. S1: SAPT-s parameter set for CO<sub>2</sub> from [2]. Energies are given in kcal mol<sup>-1</sup>, partial charges  $q$  in multiples of the elementary charge. The 5 interaction sites O-M-C-M-O are situated on the molecular axis with  $r_{C-M}=0.8456$  Å and  $r_{M-O}=0.3164$  Å.

| interaction site                  | $\epsilon$ [kJ mol <sup>-1</sup> ] | $\sigma$ [Å] |
|-----------------------------------|------------------------------------|--------------|
| <i>CO<sub>2</sub></i> (Ref. [3]): |                                    |              |
| C                                 | 0.2398                             | 2.7918       |
| O                                 | 0.6874                             | 3.0000       |
| <i>NaCl</i> [4]                   |                                    |              |
| Na                                | 0.5443                             | 2.350        |
| Cl                                | 0.4187                             | 4.450        |
| lattice constant: 5.60 Å          |                                    |              |

Tab. S2: Lennard-Jones parameters for short-range molecule-surface interaction between CO<sub>2</sub> and NaCl.

with the values given in Tab. S1. The short-range part of the molecule-surface potential  $V_{MS}$  between a CO<sub>2</sub> molecule and the NaCl(100) surface is represented by a Lennard-Jones pair-potential with potential parameters given in Tab. S2.

In a 3D-periodic optimization of bulk  $\alpha$ -CO<sub>2</sub> with the SAPT-s parameters a lattice parameter of 5.48 Å was obtained (Experiment, 80 K: 5.58 Å [5]). The bulk cohesive energy was 29.5 kJ mol<sup>-1</sup>.

Cohesive energy minimizations of CO<sub>2</sub> films assumed a rigid NaCl(100) surface without surface rumpling and a lattice parameter of 5.60 Å. The cohesive energy for NaCl(100)/c(2×2)-CO<sub>2</sub> for a film with 8 layers was 28.5 kJ mol<sup>-1</sup>. The calculated cohesive energy of the monolayer NaCl(100)/p(2×1)-CO<sub>2</sub> was 26.8 kJ mol<sup>-1</sup>.

For a film of 8 layer thickness, the center of mass coordinates as well as the tilt and azimuth angles defining the molecular orientation are given in Tab. S3 (cf. Fig. 5 of the main manuscript). The wave numbers and absorptions  $A_s$  and  $A_p$  in s-polarization and p-polarization obtained from vibrational exciton calculations using the parameter presented in Tab. 3 of the main manuscript are shown in Tab. S4.

| Molecule | x       | y       | z       | $\theta$ | $\phi$   |
|----------|---------|---------|---------|----------|----------|
| 1A       | -1.1110 | -0.1391 | 3.2368  | -35.3964 | 25.1129  |
| 1B       | 1.6882  | 2.9290  | 3.2373  | -35.4475 | -25.0311 |
| 2A       | -1.1985 | 2.8160  | 6.0146  | 34.7851  | 44.1722  |
| 2B       | 1.6017  | -0.0286 | 6.0144  | 34.7569  | -44.1878 |
| 3A       | -1.1984 | -0.0040 | 8.7046  | -35.3868 | 46.8459  |
| 3B       | 1.6016  | 2.7924  | 8.7047  | -35.3618 | -46.8675 |
| 4A       | -1.1979 | 2.7955  | 11.3810 | 35.6706  | 46.9479  |
| 4B       | 1.6019  | -0.0049 | 11.3810 | 35.6972  | -46.9093 |
| 5A       | -1.2007 | -0.0038 | 14.0549 | -35.8183 | 46.9735  |
| 5B       | 1.5991  | 2.7959  | 14.0548 | -35.8057 | -46.9835 |
| 6A       | -1.2032 | 2.7960  | 16.7303 | 35.8369  | 46.9838  |
| 6B       | 1.5966  | -0.0038 | 16.7303 | 35.8392  | -46.9819 |
| 7A       | -1.2067 | -0.0038 | 19.4068 | -35.8670 | 46.9301  |
| 7B       | 1.5933  | 2.7960  | 19.4072 | -35.8740 | -46.9307 |
| 8A       | -1.2094 | 2.7970  | 22.0819 | 35.8416  | 47.0013  |
| 8B       | 1.5909  | -0.0030 | 22.0813 | 35.8436  | -46.9380 |

Tab. S3: Center of mass coordinates  $x$ ,  $y$ ,  $z$ , tilt angle  $\theta$ , and azimuth angle  $\phi$  of the 16 inequivalent molecules in an 8 layer film  $\text{NaCl}(100)/\text{-c}(2\times 2)\text{CO}_2$ , as obtained from potential calculations. Coordinates are given in  $\text{\AA}$ , angles in degrees.  $\theta$  is measured relative to the surface plane. The origin of the coordinate system is at the site of a surface  $\text{Na}^+$ . The angle  $\phi$  is measured relative to the  $y$ -axis pointing towards a neighboring  $\text{Cl}^-$ .

| Exciton | $\tilde{\nu}$ (cm <sup>-1</sup> ) | $A_s$     | $A_p$     |
|---------|-----------------------------------|-----------|-----------|
| 1       | 2331.91                           | 0.726E-05 | 0.469E-05 |
| 2       | 2333.38                           | 0.203E-04 | 0.131E-04 |
| 3       | 2335.69                           | 0.430E-03 | 0.277E-03 |
| 4       | 2338.29                           | 0.156E-03 | 0.101E-03 |
| 5       | 2340.62                           | 0.172E-02 | 0.111E-02 |
| 6       | 2342.42                           | 0.843E-01 | 0.544E-01 |
| 7       | 2343.15                           | 0.356E+00 | 0.231E+00 |
| 8       | 2344.75                           | 0.160E+00 | 0.103E+00 |
| 9       | 2345.34                           | 0.425E-03 | 0.938E-02 |
| 10      | 2348.85                           | 0.952E-01 | 0.614E-01 |
| 11      | 2349.93                           | 0.428E-01 | 0.299E-01 |
| 12      | 2355.82                           | 0.341E-03 | 0.286E-01 |
| 13      | 2362.45                           | 0.141E-01 | 0.103E-01 |
| 14      | 2368.99                           | 0.893E-03 | 0.869E-01 |
| 15      | 2375.32                           | 0.235E-02 | 0.209E-02 |
| 16      | 2379.83                           | 0.818E-04 | 0.439E+00 |

Tab. S4: Wavenumbers  $\tilde{\nu}$  and IR absorption in s-polarization ( $A_s$ ) and p-polarization ( $A_p$ ) of a film with 8 layers as obtained from vibrational exciton calculations.

| Element | x        | y        | z        |
|---------|----------|----------|----------|
| O       | 4.08580  | 2.24480  | 15.20223 |
| C       | 3.33045  | 2.88676  | 14.57668 |
| O       | 2.57318  | 3.53876  | 13.95821 |
| O       | 1.23603  | 0.71008  | 15.20257 |
| C       | 0.48061  | 0.06818  | 14.57705 |
| O       | -0.27668 | -0.58377 | 13.95859 |
| O       | -0.20570 | 2.22963  | 12.35894 |
| C       | 0.48743  | 2.90820  | 11.69969 |
| O       | 1.18109  | 3.58806  | 11.04122 |
| O       | 2.64427  | 0.72567  | 12.35918 |
| C       | 3.33744  | 0.04717  | 11.69986 |
| O       | 4.03114  | -0.63261 | 11.04133 |
| O       | 4.03615  | 2.21664  | 9.53384  |
| C       | 3.35336  | 2.89986  | 8.86809  |
| O       | 2.67226  | 3.58289  | 8.20050  |
| O       | 1.18681  | 0.73888  | 9.53404  |
| C       | 0.50346  | 0.05605  | 8.86847  |
| O       | -0.17811 | -0.62660 | 8.20101  |
| O       | -0.11395 | 2.24258  | 6.66779  |
| C       | 0.59465  | 2.90210  | 6.00421  |
| O       | 1.30465  | 3.55763  | 5.33940  |
| O       | 2.73450  | 0.71390  | 6.66210  |
| C       | 3.44413  | 0.05119  | 6.00279  |
| O       | 4.15491  | -0.60765 | 5.34220  |
| O       | 4.41439  | 2.32706  | 3.71619  |
| C       | 3.55389  | 2.79800  | 3.07494  |
| O       | 2.67777  | 3.26726  | 2.45005  |
| O       | 1.56035  | 0.60959  | 3.70283  |
| C       | 0.70019  | 0.12616  | 3.07066  |
| O       | -0.17520 | -0.35665 | 2.45502  |
| Na      | -0.51346 | -0.05505 | -0.05519 |
| Cl      | 2.34651  | 0.04492  | 0.04885  |
| Na      | 2.33800  | 2.89147  | -0.05504 |
| Cl      | -0.50182 | 2.79192  | 0.05918  |
| Cl      | -0.46861 | -0.04767 | -2.85571 |
| Na      | 2.38017  | -0.01765 | -2.80239 |
| Cl      | 2.38113  | 2.83101  | -2.85632 |
| Na      | -0.46940 | 2.80169  | -2.79743 |
| Na      | -0.42603 | -0.05039 | -5.70321 |
| Cl      | 2.42292  | -0.04375 | -5.64933 |
| Na      | 2.42382  | 2.80593  | -5.70371 |
| Cl      | -0.42677 | 2.79938  | -5.64682 |
| Cl      | -0.39216 | -0.05121 | -8.56313 |
| Na      | 2.45872  | -0.04903 | -8.44785 |
| Cl      | 2.45753  | 2.80035  | -8.56214 |
| Na      | -0.39142 | 2.79807  | -8.44542 |

Tab. S5: Structure of a film with 8 layers as obtained from DFT-D total energy minimization. All values are given in Å.

### S3 Plane-wave DFT-D calculations

Cartesian coordinates of an optimized NaCl(100)/-c(2×2)CO<sub>2</sub> surface slab with four substrate layers and eight adsorbate layers are given in Tab. S5.

In tables S6 to S11, DFT-D results of wavenumbers, IR intensities for s- and p-polarization, as well as the components of the polarization vectors are given for a monolayer with p(2×1) symmetry, and films with 4 to 8 layers thickness.



| $\tilde{\nu}$ (cm <sup>-1</sup> ) | $I_s$    | $I_p$     | $p_x$  | $p_y$   | $p_z$  | $A_{s,\text{exptl.}}$ | $A_{p,\text{exptl.}}$ |
|-----------------------------------|----------|-----------|--------|---------|--------|-----------------------|-----------------------|
| 2349.36                           | 9.646746 | 12.222557 | 0.0168 | 0.0196  | 0.0160 | 0.1058                | 0.1026                |
| 2356.46                           | 7.883683 | 5.182599  | 0.0176 | -0.0153 | 0.0008 | 0.0667                | 0.0427                |

Tab. S6: Wavenumbers  $\tilde{\nu}$  and IR intensities of a film with monolayer coverage from pw-DFT-D calculations in s-polarization ( $I_s$ ) and p-polarization ( $I_p$ ). IR intensities are given in (Debye/Å)<sup>2</sup> amu<sup>-1</sup>. Also given are the components  $p_x$ ,  $p_y$ , and  $p_z$  of the mode polarization vector in Rydberg atomic units.  $A_{s,\text{exptl.}}$  and  $A_{p,\text{exptl.}}$  are experimental integrated absorbances in units of cm<sup>-1</sup> which have been added for the purpose of comparison. The ratio  $I_s/I_p$  for the mode ML+ is 0.79, the respective ratio for ML- is 1.52. Experimental data have  $A_s/A_p$  values of 1.03 (ML+) and 1.56 (ML-).

| $\tilde{\nu}$ (cm <sup>-1</sup> ) | $I_s$     | $I_p$     | $p_x$   | $p_y$   | $p_z$   |
|-----------------------------------|-----------|-----------|---------|---------|---------|
| 2344.11                           | 0.453962  | 0.297807  | -0.0000 | 0.0056  | 0.0001  |
| 2350.07                           | 0.022246  | 0.014814  | -0.0003 | -0.0012 | 0.0001  |
| 2356.80                           | 39.484476 | 25.965858 | 0.0521  | -0.0025 | -0.0019 |
| 2357.52                           | 16.227074 | 10.637006 | 0.0035  | 0.0333  | -0.0000 |
| 2362.45                           | 0.422408  | 5.192131  | 0.0054  | 0.0000  | 0.0146  |
| 2367.28                           | 10.695292 | 7.011789  | 0.0001  | -0.0272 | 0.0002  |
| 2372.21                           | 0.361499  | 0.745426  | -0.0050 | -0.0000 | -0.0047 |
| 2383.02                           | 0.046948  | 24.997531 | -0.0018 | 0.0000  | -0.0329 |

Tab. S7: Wavenumbers  $\tilde{\nu}$  and IR intensities of a film with 4 layers from pw-DFT-D calculations in s-polarization ( $I_s$ ) and p-polarization ( $I_p$ ). IR intensities are given in (Debye/Å)<sup>2</sup> amu<sup>-1</sup>. Also given are the components  $p_x$ ,  $p_y$ , and  $p_z$  of the mode polarization vector in Rydberg atomic units.

| $\tilde{\nu}$ (cm <sup>-1</sup> ) | $I_s$     | $I_p$     | $p_x$   | $p_y$   | $p_z$   |
|-----------------------------------|-----------|-----------|---------|---------|---------|
| 2343.23                           | 0.046436  | 0.030661  | 0.0003  | -0.0018 | 0.0001  |
| 2347.95                           | 0.495713  | 0.325178  | 0.0005  | 0.0058  | 0.0001  |
| 2353.37                           | 1.252559  | 0.821295  | 0.0001  | -0.0093 | 0.0001  |
| 2356.52                           | 47.831621 | 32.940552 | -0.0575 | -0.0001 | -0.0083 |
| 2357.68                           | 23.577049 | 15.454986 | -0.0007 | 0.0403  | -0.0000 |
| 2360.32                           | 0.722773  | 0.492707  | 0.0070  | 0.0005  | -0.0009 |
| 2366.61                           | 10.239418 | 6.735074  | 0.0001  | -0.0266 | -0.0010 |
| 2367.9                            | 0.279957  | 7.391316  | -0.0041 | 0.0016  | -0.0177 |
| 2375.93                           | 0.114262  | 0.654148  | -0.0028 | -0.0001 | -0.0050 |
| 2385.17                           | 0.041956  | 33.107721 | -0.0017 | 0.0001  | -0.0379 |

Tab. S8: Wavenumbers  $\tilde{\nu}$  and IR intensities of a film with 5 layers from pw-DFT-D calculations in s-polarization ( $I_s$ ) and p-polarization ( $I_p$ ). IR intensities are given in (Debye/Å)<sup>2</sup> amu<sup>-1</sup>. Also given are the components  $p_x$ ,  $p_y$ , and  $p_z$  of the mode polarization vector in Rydberg atomic units.

| $\tilde{\nu}$ (cm <sup>-1</sup> ) | $I_s$     | $I_p$     | $p_x$   | $p_y$   | $p_z$   |
|-----------------------------------|-----------|-----------|---------|---------|---------|
| 2343.37                           | 0.355583  | 0.233088  | -0.0000 | 0.0050  | -0.0000 |
| 2347.16                           | 0.175541  | 0.115306  | 0.0005  | 0.0034  | -0.0001 |
| 2349.95                           | 2.061491  | 1.351559  | 0.0007  | 0.0119  | -0.0001 |
| 2354.29                           | 4.865167  | 3.189164  | -0.0003 | 0.0183  | 0.0000  |
| 2356.44                           | 56.582043 | 37.092157 | -0.0625 | 0.0005  | 0.0003  |
| 2358.04                           | 26.965507 | 17.687476 | 0.0001  | -0.0431 | -0.0007 |
| 2358.80                           | 0.092224  | 3.379107  | 0.0021  | 0.0014  | -0.0120 |
| 2365.82                           | 6.802517  | 4.518221  | 0.0026  | 0.0215  | 0.0016  |
| 2365.93                           | 3.419619  | 2.353018  | 0.0038  | -0.0149 | 0.0022  |
| 2372.61                           | 0.126061  | 10.496919 | -0.0029 | 0.0005  | -0.0212 |
| 2379.36                           | 0.047913  | 0.389445  | -0.0018 | -0.0000 | -0.0039 |
| 2387.55                           | 0.005373  | 42.744641 | -0.0006 | 0.0001  | -0.0430 |

Tab. S9: Wavenumbers  $\tilde{\nu}$  and IR intensities of a film with 6 layers from pw-DFT-D calculations in s-polarization ( $I_s$ ) and p-polarization ( $I_p$ ). IR intensities are given in (Debye/Å)<sup>2</sup> amu<sup>-1</sup>. Also given are the components  $p_x$ ,  $p_y$ , and  $p_z$  of the mode polarization vector in Rydberg atomic units.

| $\tilde{\nu}$ (cm <sup>-1</sup> ) | $I_s$     | $I_p$     | $p_x$   | $p_y$   | $p_z$   |
|-----------------------------------|-----------|-----------|---------|---------|---------|
| 2344.66                           | 0.032305  | 0.021409  | 0.0010  | -0.0011 | 0.0001  |
| 2345.28                           | 0.443902  | 0.291214  | 0.0004  | -0.0055 | 0.0001  |
| 2350.90                           | 0.753946  | 0.494447  | -0.0015 | -0.0071 | -0.0001 |
| 2352.70                           | 5.142243  | 3.376544  | -0.0053 | -0.0181 | -0.0005 |
| 2355.94                           | 8.259198  | 5.472808  | -0.0144 | 0.0191  | -0.0016 |
| 2356.52                           | 60.733024 | 41.038308 | -0.0640 | -0.0101 | -0.0073 |
| 2357.34                           | 31.766981 | 20.868827 | -0.0096 | 0.0458  | -0.0014 |
| 2358.07                           | 1.665999  | 1.097821  | -0.0084 | 0.0067  | 0.0005  |
| 2362.61                           | 0.402107  | 5.636013  | 0.0050  | 0.0017  | 0.0153  |
| 2365.84                           | 9.378510  | 6.148630  | -0.0008 | 0.0254  | -0.0002 |
| 2369.75                           | 0.064418  | 1.015799  | 0.0021  | 0.0002  | 0.0065  |
| 2376.85                           | 0.256851  | 9.698213  | -0.0042 | 0.0002  | -0.0203 |
| 2382.00                           | 0.018715  | 0.133497  | 0.0011  | -0.0003 | 0.0023  |
| 2388.87                           | 0.009860  | 57.247368 | -0.0008 | 0.0002  | -0.0498 |

Tab. S10: Wavenumbers  $\tilde{\nu}$  and IR intensities of a film with 7 layers from pw-DFT-D calculations in s-polarization ( $I_s$ ) and p-polarization ( $I_p$ ). IR intensities are given in (Debye/Å)<sup>2</sup> amu<sup>-1</sup>. Also given are the components  $p_x$ ,  $p_y$ , and  $p_z$  of the mode polarization vector in Rydberg atomic units.

| $\tilde{\nu}$ (cm <sup>-1</sup> ) | $I_s$     | $I_p$     | $p_x$   | $p_y$   | $p_z$   |
|-----------------------------------|-----------|-----------|---------|---------|---------|
| 2344.49                           | 0.266973  | 0.175233  | 0.0001  | -0.0043 | -0.0001 |
| 2344.94                           | 0.188547  | 0.124514  | 0.0024  | 0.0027  | -0.0002 |
| 2348.96                           | 1.514418  | 0.993640  | 0.0032  | -0.0097 | -0.0002 |
| 2351.84                           | 0.036434  | 0.024123  | 0.0015  | 0.0004  | 0.0001  |
| 2353.89                           | 5.476878  | 3.593821  | 0.0077  | -0.0179 | -0.0004 |
| 2356.17                           | 6.416616  | 4.244973  | -0.0122 | -0.0172 | 0.0013  |
| 2357.04                           | 66.344598 | 43.822417 | -0.0667 | 0.0115  | 0.0038  |
| 2357.37                           | 40.703769 | 26.696454 | -0.0146 | -0.0510 | -0.0008 |
| 2358.01                           | 3.000127  | 6.055514  | 0.0122  | -0.0076 | 0.0133  |
| 2361.90                           | 0.213071  | 0.140596  | -0.0025 | 0.0029  | -0.0002 |
| 2365.85                           | 9.461972  | 6.500951  | 0.0019  | 0.0255  | 0.0036  |
| 2366.95                           | 0.255327  | 7.426880  | -0.0023 | 0.0035  | -0.0177 |
| 2372.64                           | 0.144228  | 1.623789  | 0.0027  | -0.0016 | 0.0081  |
| 2379.30                           | 0.130240  | 8.934658  | -0.0030 | 0.0000  | -0.0196 |
| 2383.61                           | 0.020803  | 0.493574  | -0.0011 | 0.0005  | -0.0046 |
| 2389.09                           | 0.008416  | 74.262561 | -0.0007 | -0.0003 | -0.0567 |

Tab. S11: Wavenumbers  $\tilde{\nu}$  and IR intensities of a film with 8 layers from pw-DFT-D calculations in s-polarization ( $I_s$ ) and p-polarization ( $I_p$ ). IR intensities are given in (Debye/Å)<sup>2</sup> amu<sup>-1</sup>. Also given are the components  $p_x$ ,  $p_y$ , and  $p_z$  of the mode polarization vector in Rydberg atomic units.

## References

- [1] Valeri Tolstoy, Irina Chernishova, and Valeri Skryshevsky. Handbook of Infrared Spectroscopy of Ultrathin Films. Wiley, Hoboken, New Jersey, 2003.
- [2] Robert Bukowski, Joanna Sadlej, Bogumił Jeziorski, Piotr Jankowski, Krzysztof Szalewicz, Stanisław A. Kucharski, Hayes L. Williams, and Betsy M. Rice. Intermolecular potential of carbon dioxide dimer from symmetry-adapted perturbation theory. The Journal of Chemical Physics, 110(8):3785–3803, 1999.
- [3] Zhigang Zhang and Zhenhao Duan. An optimized molecular potential for carbon dioxide. The Journal of Chemical Physics, 122(21):214507, 06 2005.
- [4] David E. Smith and Liem X. Dang. Computer simulations of NaCl association in polarizable water. The Journal of Chemical Physics, 100(5):3757–3766, 03 1994.
- [5] T.P. Mangan, C.G. Salzmann, J.M.C. Plane, and B.J. Murray. Co<sub>2</sub> ice structure and density under martian atmospheric conditions. Icarus, 294:201–208, 2017.
